# Supplementary material
Source: Research Square preprint supplement (doi:10.21203/rs.3.rs-9923857/v1)
Supplement: Supplementary file 1 [file 21e7c528dc1a4fbe8212227b.pdf]

# 1     **Physics-Informed Generalizable Framework Bridges** 2     **the Sim-to-Real Gap in AI-based Cerebrovascular** 3     **Hemodynamics Modeling**

## 4 5     **Supplementary information**

### 6     **Supplementary Notes**

- 7     1. Data collection protocol
- 8     2. Generation process of patient-specific CFD Data
- 9     3. Data processing of 4D MRI data
- 10    4. 4DHemoFormer implementation details
- 11    5. Setups for baseline methods
- 12    6. Runtime evaluation settings

### 13 14    **Supplementary Figures**

- 15    1. Performance of temporal extrapolation in single-step prediction task.  
16    Comparison between the hemodynamic fields learned and the reference, using  
17    CCA as the example.
  - 18    2. Performance of temporal extrapolation in single-step prediction task.  
19    Comparison between the hemodynamic fields learned and the reference, using  
20    ECA as the example.
  - 21    3. Performance of temporal extrapolation in single-step prediction task.  
22    Comparison between the hemodynamic fields learned and the reference, using VA  
23    as the example.
  - 24    4. Performance of temporal extrapolation in single-step prediction task.  
25    Comparison of the average performance in terms of nRMSE of the 4DHemoFormer  
26    with 3 baseline architectures for individual velocity components.
  - 27    5. Performance of temporal extrapolation in multi-step prediction task.  
28    Comparison between the hemodynamic fields learned and the reference, using  
29    CCA as the example.
  - 30    6. Performance of temporal extrapolation in multi-step prediction task.  
31    Comparison between the hemodynamic fields learned and the reference, using  
32    ECA as the example.
  - 33    7. Performance of temporal extrapolation in multi-step prediction task.  
34    Comparison between the hemodynamic fields learned and the reference, using VA  
35    as the example.
  - 36    8. Performance of temporal extrapolation in multi-step prediction task.  
37    Comparison of the average performance in terms of nRMSE of the 4DHemoFormer  
38    with 3 baseline architectures for individual velocity components and pressure field.
-

- 39 **9. Performance of temporal extrapolation in multi-step prediction task. Temporal**  
40 **error propagation for individual velocity components predictions in terms of**  
41 **nRMSE.**
- 42 **10. Performance for cross-geometry generalization in single-step prediction task.**  
43 **Overall performance evaluation of 4DHemoFormer and baselines on 8**  
44 **cross-geometry tasks in terms of nRMSE for individual velocity and pressure**  
45 **components.**
- 46 **11. Performance for cross-geometry generalization in single-step prediction task.**  
47 **Detailed evaluation of 4DHemoFormer and baselines for individual velocity and**  
48 **pressure components on each cross-geometry task.**
- 49 **12. Performance for cross-geometry generalization in multi-step prediction task.**  
50 **Overall performance evaluation of 4DHemoFormer and baselines for individual**  
51 **velocity and pressure components on 8 cross-geometry tasks in terms of nRMSE.**
- 52 **13. Performance for cross-geometry generalization in multi-step prediction task.**  
53 **Detailed evaluation of 4DHemoFormer and baselines for individual velocity and**  
54 **pressure components on each cross-geometry task.**
- 55 **14. Performance for cross-geometry generalization in multi-step prediction task.**  
56 **Temporal error propagation for individual velocity components predictions.**
- 57 **15. Comparison of the model's accuracy between the normal and stenosed groups**
- 58 **16. Impact of physics loss weight on prediction performance.**
- 59 **17. The workflow of construction process of the CFD dataset**
- 60 **18. Post-processing of 4D Flow MRI images**

61

## 62 **Supplementary Tables**

63 **1. Subjects information**

64 **2. Prediction Performance for single-step prediction task on temporal extrapolation**

65 **3. Prediction Performance for multi-step prediction task on temporal extrapolation**

66 **4. Prediction Performance for single-step prediction task on cross-geometry**  
67 **generalization**

68 **5. Prediction Performance for multi-step prediction task on cross-geometry**  
69 **generalization**

70 **6. Prediction Performance for cross-domain transferability in single-step and**  
71 **multi-step prediction task**

72 **7. Runtime of the models**

73 **8. Parameters settings for 4DHemoFormer and baseline methods**

74

75

76

77

78

79

80

81

82

---

## 83 **Supplementary Notes**

### 84 **1. Data collection protocols**

#### 85 **Study Population and Ethics**

86 This study was conducted at the Medical Imaging Diagnostic Center, Shanghai  
87 Imagingrace (Shanghai, China) and was approved by the Institutional Review Board of  
88 Fuwai Hospital Shenzhen, Chinese Academy of Medical Sciences (Approval No.  
89 SP2024095(01)). Written informed consent was obtained from all participants. A total of  
90 40 subjects were randomly recruited for the study; detailed demographic information is  
91 provided in Supplementary Table 1.

#### 92

#### 93 **MRI Acquisition Protocol**

94 Multi-sequence MRI data were acquired using a 3.0 T scanner (uMR Omega, United  
95 Imaging Healthcare, Shanghai, China) with a maximum gradient slew rate of 200 T/m/s  
96 and a gradient strength of 45 mT/m. Subjects were positioned supine with the mandible  
97 slightly elevated to expose the bilateral carotid regions. The scan plane was centered at  
98 the carotid artery bifurcation with axial slices perpendicular to the vessel lumen.

99 High-resolution images of the head and neck vasculature were first collected using a  
100 3D Time-of-Flight (TOF) MRA sequence to enable the 3D reconstruction of  
101 cerebrovascular artery geometry. The acquisition parameters were as follows: repetition  
102 time (TR) = 18.3 ms; echo time (TE) = 3.5 ms; flip angle (FA) = 16°; field of view (FOV) =  
103 224 × 180 mm<sup>2</sup>; matrix = 320 × 100; 4 slabs with 30 slices per slab; slice thickness = 1.4  
104 mm; number of excitations (NEX) = 1; and bandwidth = 350 Hz/pixel. Scan duration and  
105 spatial resolution varied by segment: head (2:11 min, 0.7 × 0.7 × 1.1 mm<sup>3</sup>), neck (2:57 min,  
106 0.7 × 0.7 × 1.4 mm<sup>3</sup>), and chest (3:08 min, 0.75 × 0.75 × 1.6 mm<sup>3</sup>).

107 Subsequently, *in-vivo* blood velocity fields were acquired using a 4D Flow MRA  
108 sequence with the following settings: TR = 33.4 ms; TE = 3.76 ms; FA = 8°; FOV = 217 ×  
109 225 mm<sup>2</sup>; matrix = 240 × 100; 4 slabs with 60 slices per slab; slice thickness = 0.9 mm;  
110 NEX = 1; and bandwidth = 350 Hz/pixel. The sequence utilized an isotropic voxel size of  
111 0.6 × 0.6 × 0.6 mm<sup>3</sup>, a temporal resolution of 20 frames per cardiac cycle, and a velocity  
112 encoding (VENC) of 110 cm/s. The total scan duration for 4D Flow was approximately  
113 9:35 min.

#### 114

#### 115 **Doppler Ultrasound Acquisition**

116 Patient-specific velocity waveforms were measured using Doppler ultrasonography  
117 (Affiniti 30, Philips, USA). Measurements included the bilateral common and internal  
118 carotid artery velocity waveforms.

### 119

### 120 **2. Generation process of patient-specific CFD Data**

121 The generation of patient-specific Computational Hemodynamic Data is a  
122 multi-stage workflow that transforms clinical medical images into high-fidelity,  
123 time-resolved flow fields (Supplementary Fig. 17). The process is outlined as follows.

124 (1) 3D Geometry Reconstruction: The acquired images collected from 3D Time-of-Flight  
125 (TOF) Magnetic Resonance Angiography (MRA) are processed using segmentation  
126 software (Materialise Mimics Innovation Suite Research 21.0) to isolate the lumen (the

---

127 inner channel) of the target blood vessels (e.g., the carotid artery) from the surrounding  
128 tissues. The segmented region is converted into a 3D, watertight surface model, which  
129 digitally represents the anatomical geometry as Common Carotid Artery (CCA), Internal  
130 Carotid Artery (ICA), External Carotid Artery (ECA) and Vertebral Artery (VA), with the  
131 existing mask threshold values range from 250 GV to 750 GV. Using software (Materialise  
132 3-Matic Research 13.0), employed to optimize the three-dimensional models generated  
133 in Mimics Research by repairing defects such as holes, geometric flaws, and redundant  
134 surfaces. In addition, the three-dimensional mesh is edited to refine structural details,  
135 thereby improving the overall accuracy and quality of the model and then converting into  
136 STL format for subsequent processing and application.

137 (2) Mesh Generation: The 3D surface model is imported into a meshing tool (Geomagic  
138 Wrap v2021.2.2), in which the STL file contents are converted into a geometrically usable  
139 three-dimensional model to support further analysis, modification, and application. The  
140 fluid domain (the space inside the vessels where blood flows) is discretized into a large  
141 number of small, interconnected elements, such as tetrahedra or polyhedra, to form  
142 computational surface patches, with the following parameter settings: surface patches:  
143 CCA: 1000s, ECA: 1500s, ICA: 1500s, and VA : 3000s. Subsequently, a structured mesh  
144 is generated on each surface of the model. The resolution used for mesh generation is  
145 specified as 20. The mesh is typically refined near the vessel walls and in regions of  
146 complex geometry to accurately capture high velocity gradients and wall shear stresses.  
147 The mesh size is non-uniform, with the maximum element edge length not exceeding  
148 0.45 mm.

149 (3) Definition of Fluid Properties and Boundary Conditions: Blood is modeled as an  
150 incompressible, Newtonian fluid with a constant density of  $1060\text{kg}/\text{m}^3$  and different  
151 viscosity of  $0.00277/0.00345/0.00413\text{Pa}\cdot\text{s}$  for larger arteries. A patient-specific,  
152 time-varying velocity waveform—obtained from Doppler Ultrasound measurements at  
153 the common carotid artery—is prescribed at the inlet(s) of the model. The outlet(s) are  
154 signed Windkessel R-C-R models that mimic the resistance and compliance of the  
155 downstream vasculature.

156 (4) CFD Simulation: The meshed geometry and boundary conditions are processed  
157 using ANSYS Fluent 2025, a CFD software based on the finite volume method. A  
158 pressure-based solver and a transient laminar flow model were employed during the  
159 simulations. The laminar flow model iteratively computes the numerical solution to the  
160 governing Navier-Stokes equations, which describe the conservation of mass and  
161 momentum for fluid flow. The simulation time step was set to 0.002 s, with a maximum of  
162 50 iterations per time step to ensure that the residuals reached the prescribed threshold  
163 of  $1 \times 10^{-3}$ . Results were exported every 25 time steps, corresponding to a time interval  
164 of 0.05 s.

165 (5) Post-processing and Data Extraction: Once converged, the results are  
166 post-processed to extract full, time-varying 3D hemodynamic fields including Velocity  
167 (vector field) and Pressure. The final output is a comprehensive, spatio-temporal dataset  
168 that represents the simulated hemodynamics within the patient's specific anatomy.

169  
170

### 3. Post-processing of 4D MRI data

---

171 Raw 4D-flow MRI data were reconstructed into time-resolved 4D datasets (three  
172 spatial dimensions plus time), comprising both anatomical magnitude and  
173 phase-contrast velocity images. Post-processing was performed using iTFlow software  
174 (Cardio Flow Design Inc., Japan). Key steps included phase unwrapping to correct  
175 velocity aliasing and noise filtering to enhance data quality. The three directional velocity  
176 components were then synthesized into a time-resolved 3D velocity vector field.  
177 Following vascular segmentation based on the magnitude images, quantitative  
178 hemodynamic parameters, including the velocity field and wall shear stress (WSS), were  
179 derived. Finally, the digitized flow fields were exported in .vtk format for downstream  
180 analysis (Supplementary Fig. 18).

#### 181 182 **4. Implemental details of 4DHemoFormer framework**

183 The proposed 4DHemoFormer framework incorporates several tailored architectural  
184 designs to optimize performance for fluid dynamics tasks. First, two separate Multilayer  
185 Perceptron (MLP) networks encode the flow field features and spatiotemporal  
186 information, respectively; their outputs are then summed to generate the input  
187 embeddings. The encoder module consists of a four-layer Transformer architecture. To  
188 enhance training stability and convergence, it adopts Pre-Layer Normalization (Pre-LN).  
189 Additionally, the standard ReLU is replaced with the Sigmoid Linear Unit (SiLU) activation  
190 function, which provides smooth differentiability and gradient stability, thereby effectively  
191 capturing spatiotemporal dependencies across diverse cases and time frames. For the  
192 decoding phase, an MLP-based structure is utilized. This decoder performs direct  
193 feature decoding for single-step predictions, whereas for multi-step tasks, it integrates  
194 cross-temporal features to facilitate long-term flow field forecasting. Finally, model  
195 training is governed by a hybrid loss function, combining a data-driven loss with a  
196 physics-informed loss derived from the incompressible Navier-Stokes equations to  
197 enforce physical constraints. Detailed architectural hyperparameters and training  
198 settings are provided in Supplementary Table 8.

#### 199 200 **5. Setup of baseline methods**

201 The PINN, DeepONet and FNO are compared with our model on the 4DHemoDB to  
202 validate the temporal extrapolation, cross-geometry generalization performance. The  
203 experimental setups are listed below:

204 The implementation of PINN using fully-connected neural networks (FNN) is based on  
205 the open-source Python library DeepXDE, with parameters detailed in Supplementary  
206 Table 8. The pipeline of training FNO and DeepONets is based on the open-source  
207 Python code provided in CFDBench<sup>47</sup>. All hyperparameter optimization strategies for  
208 baseline methods follow the same settings used in CFDBench. Specifically, for FNO,  
209 DeepONets, we use the Adam optimizer with a learning rate of  $10^{-3}$ , combined with a  
210 learning rate scheduler that cuts the learning rate by 0.9 every 20 epochs. The FNO and  
211 DeepONets are designed for voxel data. To address the irregularity of hemodynamic data,  
212 we firstly employed a voxelization strategy before modeling. The voxelization process  
213 involves three key steps. (1) Space Partitioning: A 3D bounding box is defined to  
214 encapsulate the region of vascular geometry. (2) Grid Generation: This space is

---

215 subdivided into a regular grid of discrete cubic elements with a predefined resolution of  
216  $80 \times 120 \times 210$ ; (3) Feature Assignment: Input data points are mapped to their  
217 corresponding voxels. For each voxel, a specific value is assigned by aggregating the  
218 features of the points falling within it via average pooling. Other detailed hyperparameters  
219 of network architecture and the settings for DeepONet and FNO are listed in  
220 Supplementary Table 8.

221

## 222 **6. Runtime evaluation**

223 To assess computational efficiency, we evaluated the training and inference time of  
224 4DHemoFormer, baseline deep learning models (including FNO, DeepONets, and PINNs),  
225 and a full-order model (numerical simulation) across all tasks. For the full-order model,  
226 the reported computational time denotes the assimilation time required by a conventional  
227 numerical solver coupled with an ensemble-based variational data assimilation  
228 technique<sup>s1,s2</sup>—a robust approach widely adopted for complex dynamical systems.  
229 Notably, because numerical simulations necessitate well-posed boundary conditions and  
230 sufficient grid resolution to ensure convergence, the execution time for the full-order  
231 model was benchmarked using the identical spatiotemporal grid and numerical setup  
232 employed to generate the training data. Numerical simulations were executed on a  
233 Windows 11 (24H2) workstation powered by an AMD Ryzen 7 9700X processor (5.5 GHz  
234 maximum clock speed). All computations utilized double-precision floating-point  
235 arithmetic (FP64) to guarantee high-fidelity results.

236 All training and testing were conducted on a single Linux server (Ubuntu 24.04.3 LTS)  
237 equipped with an Intel Xeon Platinum 8468 CPU and an NVIDIA H100 GPU (Driver  
238 Version: 550.163.01, CUDA Version: 12.4). The computational times are detailed in  
239 Supplementary Table 7.

240

241

242

243

244

245

246

247

248

249

250

251

252

253

254

255

256

257

258

---

259 **Supplementary Figures**

260

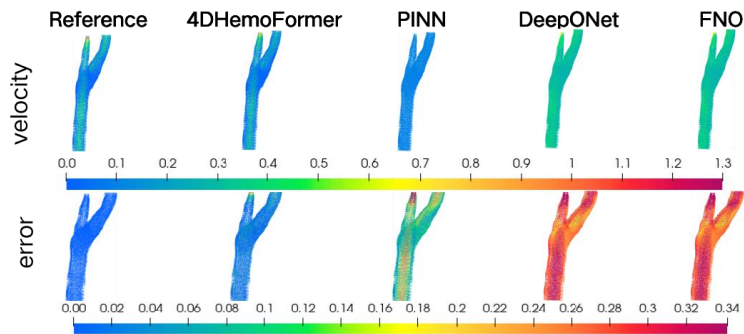

261

262 **Supplementary Fig. 1. | Performance of temporal extrapolation in single-step**  
263 **prediction task.** Comparison between the hemodynamic velocity fields learned and the  
264 reference, using CCA as the example.

265

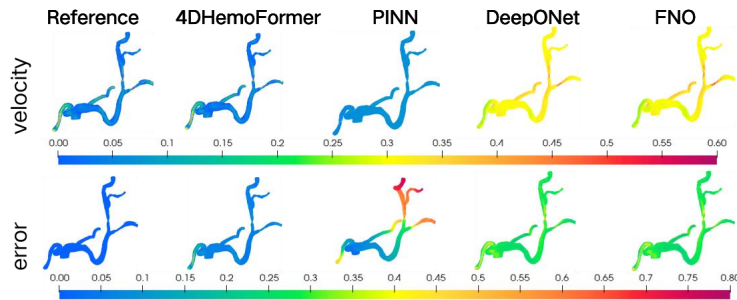

266

267 **Supplementary Fig. 2. | Performance of temporal extrapolation in single-step**  
268 **prediction task.** Comparison between the hemodynamic velocity fields learned and the  
269 reference, using ECA as the example.

270

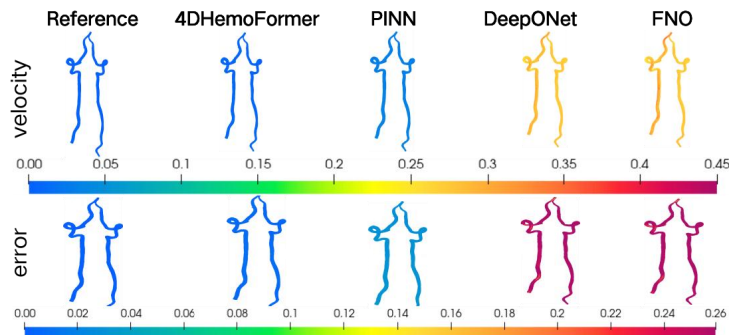

271

272 **Supplementary Fig. 3. | Performance of temporal extrapolation in single-step**  
273 **prediction task.** Comparison between the hemodynamic velocity fields learned and the  
274 reference, using VA as the example.

275

276

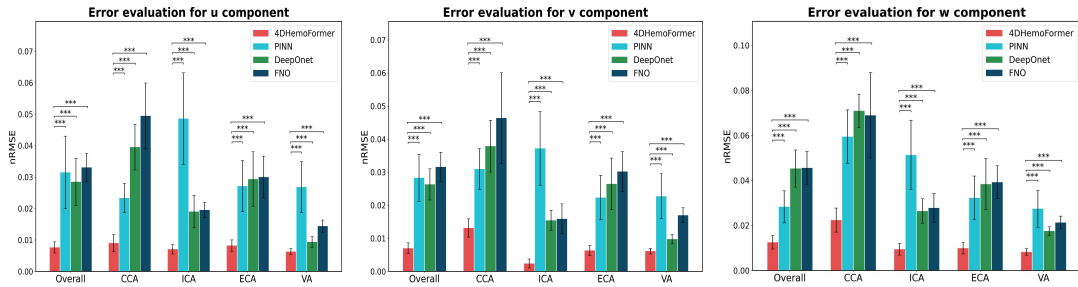

277

278 **Supplementary Fig. 4. | Performance of temporal extrapolation in single-step**  
 279 **prediction task.** Comparison of the average performance in terms of nRMSE of the  
 280 4DHemoFormer with 3 baseline architectures for individual velocity components. The  
 281 error bars represent the mean values  $\pm$  std., calculated from the method's predictions  
 282 across the test dataset. \*\*\* $p < 0.001$ .  
 283

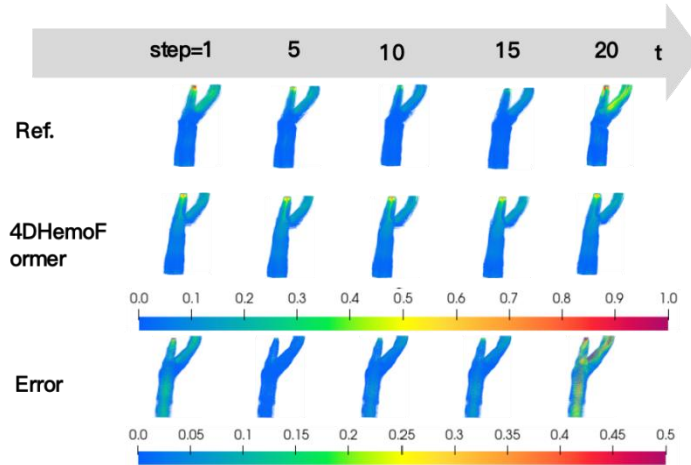

284

285 **Supplementary Fig. 5. | Performance of temporal extrapolation in multi-step**  
 286 **prediction task.** Comparison between the hemodynamic velocity fields learned and the  
 287 reference, using CCA as the example. From up to bottom, the panels represent the  
 288 numerical simulation (denoted as Ref.), the 4DHemoFormer predictions, and the relative  
 289 error with time steps.  
 290

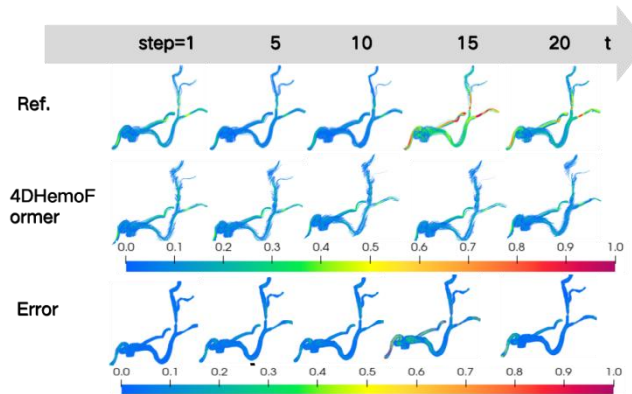

291

292 **Supplementary Fig. 6. | Performance of temporal extrapolation in multi-step**  
 293 **prediction task.** Comparison between the hemodynamic velocity fields learned and the

294 reference, using ECA as the example. From up to bottom, the panels represent the  
 295 numerical simulation (denoted as Ref.), the 4DHemoFormer predictions, and the relative  
 296 error with time steps.  
 297

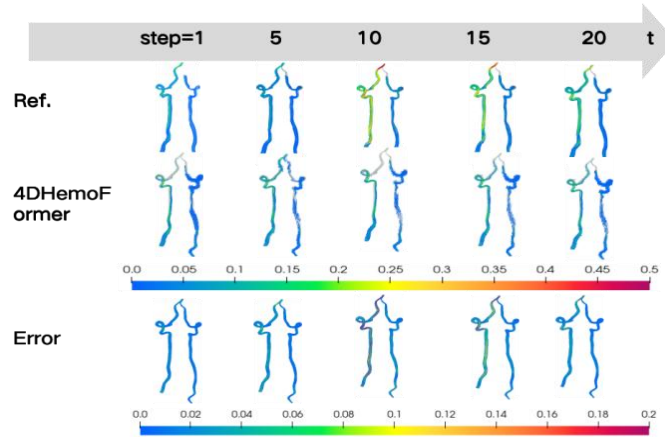

298  
 299 **Supplementary Fig. 7. | Performance of temporal extrapolation in multi-step**  
 300 **prediction task.** Comparison between the hemodynamic velocity fields learned and the  
 301 reference, using VA as the example. From up to bottom, the panels represent the  
 302 numerical simulation (denoted as Ref.), the 4DHemoFormer predictions, and the relative  
 303 error with time steps.  
 304

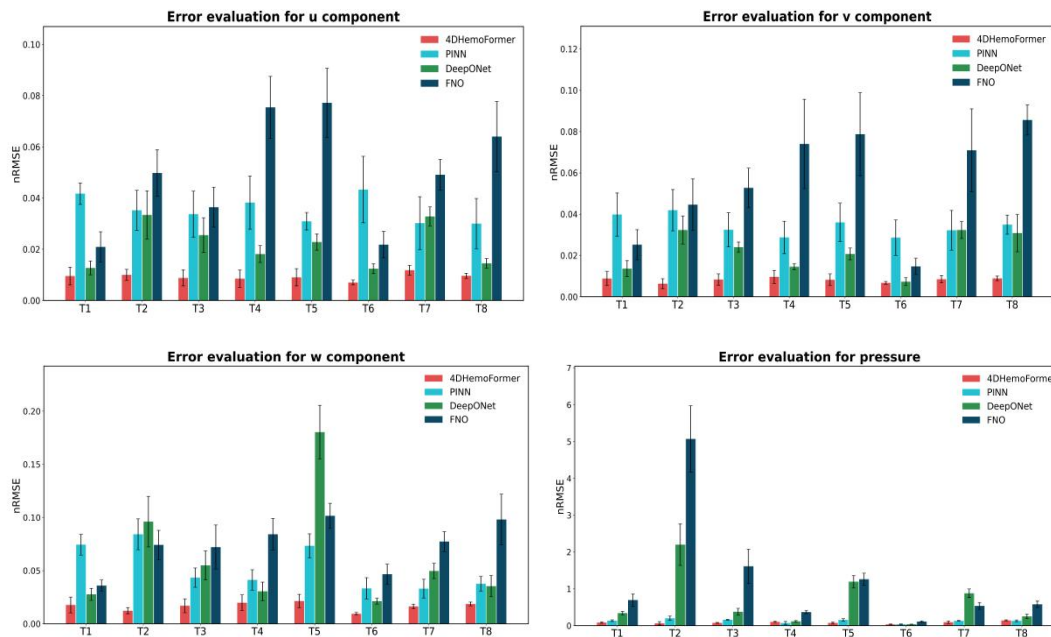

305  
 306  
 307 **Supplementary Fig. 8. | Performance of temporal extrapolation in multi-step**  
 308 **prediction task.** Comparison of the average performance in terms of nRMSE of the  
 309 4DHemoFormer with 3 baseline architectures for individual velocity components and  
 310 pressure field. The error bars represent the mean values $\pm$ std., calculated from the  
 311 method's predictions across the test dataset. \*\*\* $p < 0.001$ .

312

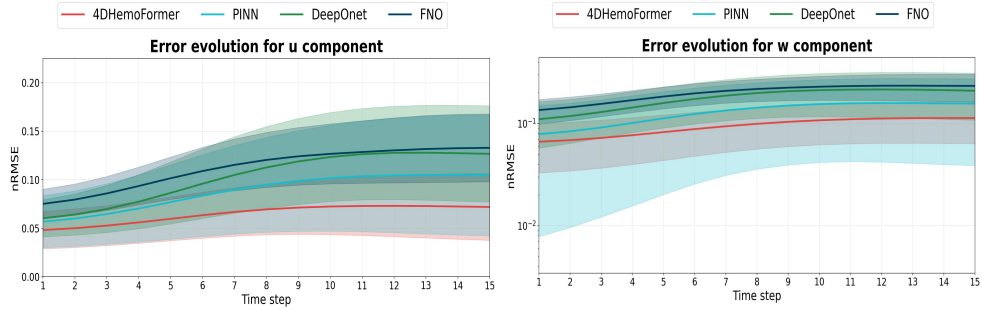

313

314 **Supplementary Fig. 9. | Performance of temporal extrapolation in multi-step**  
 315 **prediction task.** Temporal error propagation for individual velocity components  
 316 predictions in terms of nRMSE. Shaded region represent the variance band.

317

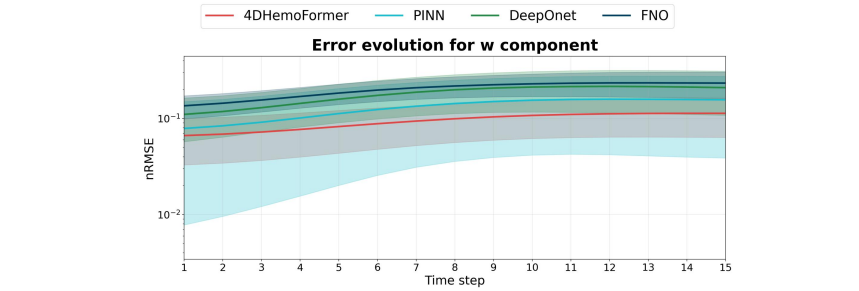

318

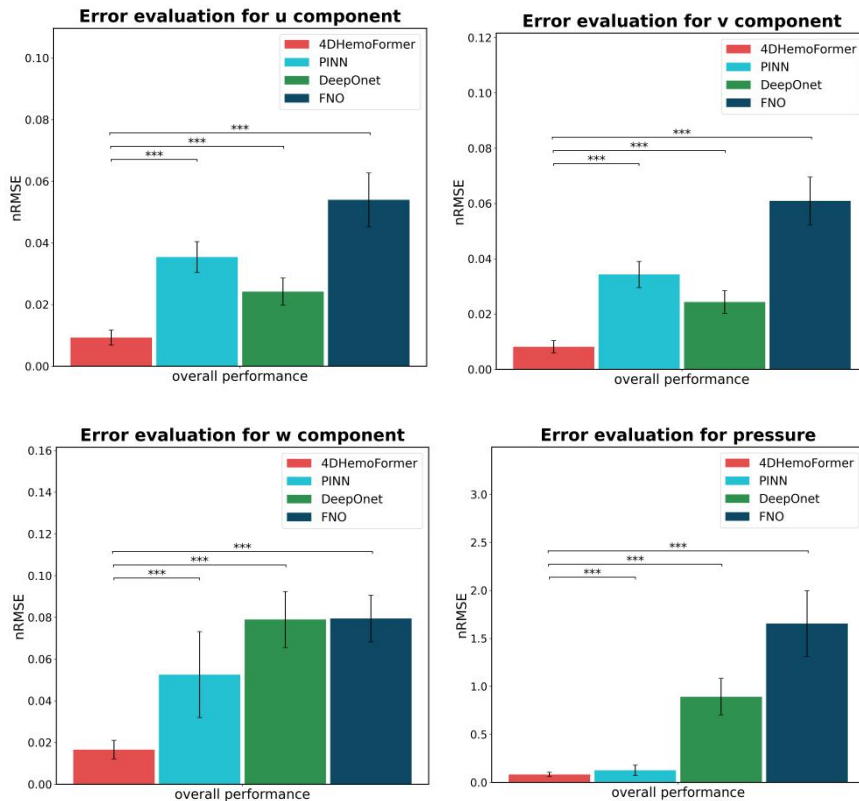

319

320

321 **Supplementary Fig. 10. | Performance for cross-geometry generalization in**  
 322 **single-step prediction task.** Overall performance evaluation of 4DHemoFormer and  
 323 baselines on 8 cross-geometry tasks in terms of nRMSE for individual velocity

324 component and pressure component. The bar graph indicates the mean $\pm$ std.  
 325 \*\*\*p<0.001.  
 326

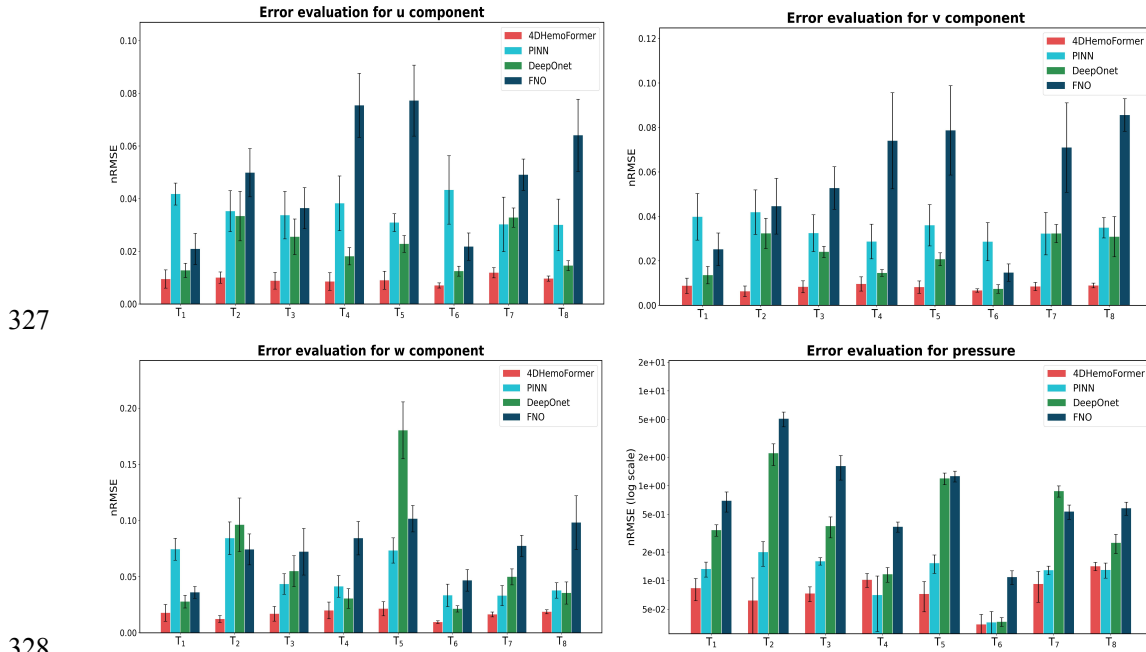

329 **Supplementary Fig. 11. | Performance for cross-geometry generalization in**  
 330 **single-step prediction task.** Detailed evaluation of 4DHemoFormer and baselines for  
 331 individual velocity and pressure component on each cross-geometry task.  
 332

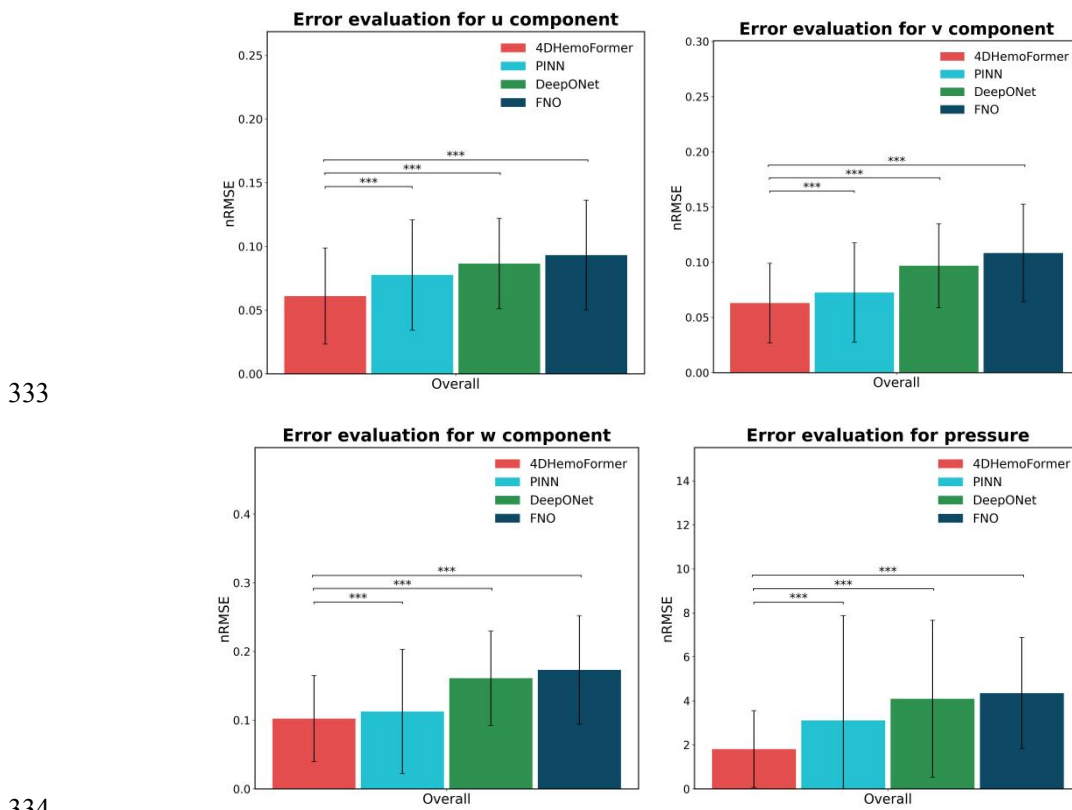

335 **Supplementary Fig. 12. | Performance for cross-geometry generalization in**  
 336 **multi-step prediction task.** Overall performance evaluation of 4DHemoFormer and  
 337 baselines for individual velocity and pressure component on 8 cross-domain tasks in  
 338 terms of nRMSE. The bar graph indicates the mean $\pm$ std. \*\*\*P<0.001.

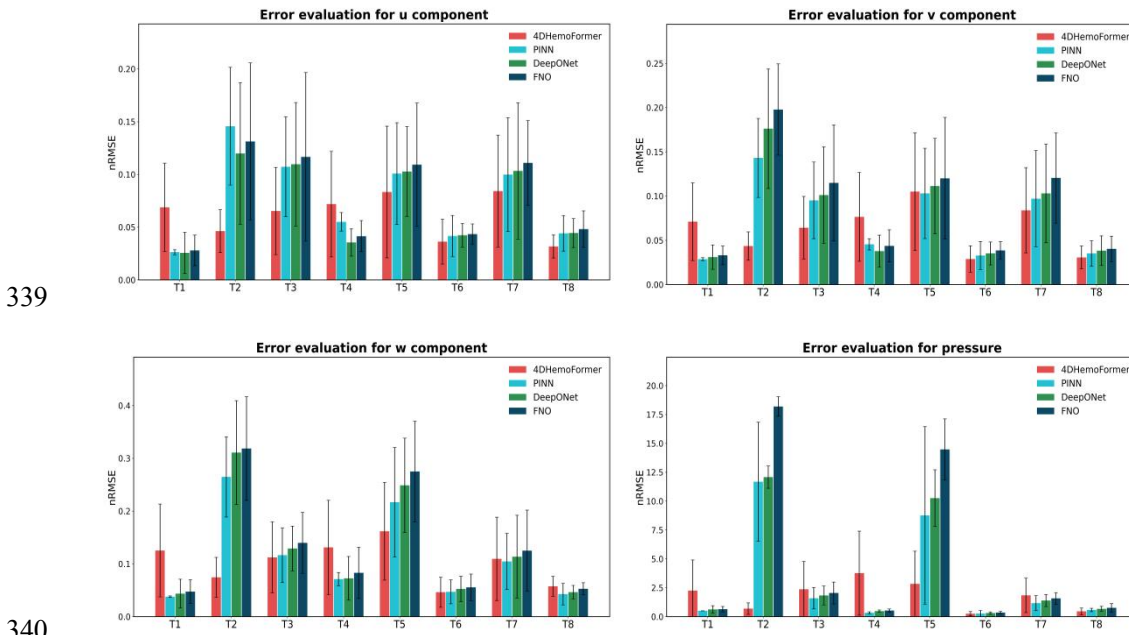

341 **Supplementary Fig. 13. | Performance for cross-geometry generalization in**  
 342 **multi-step prediction task.** Detailed evaluation of 4DHemoFormer and baselines for  
 343 individual velocity and pressure component on each cross-geometry task.  
 344

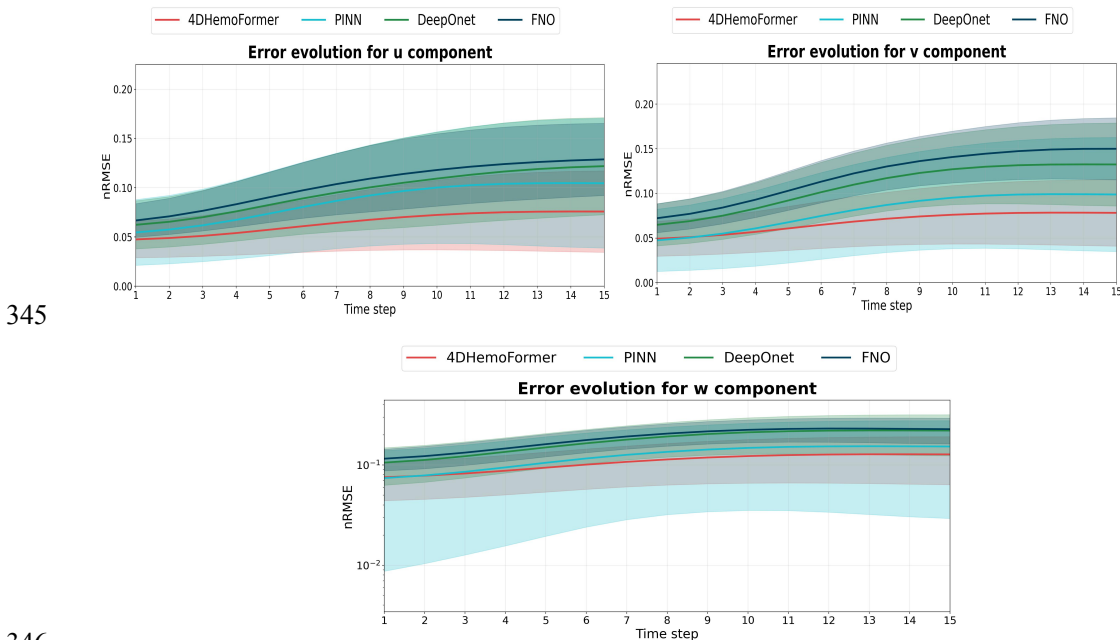

350

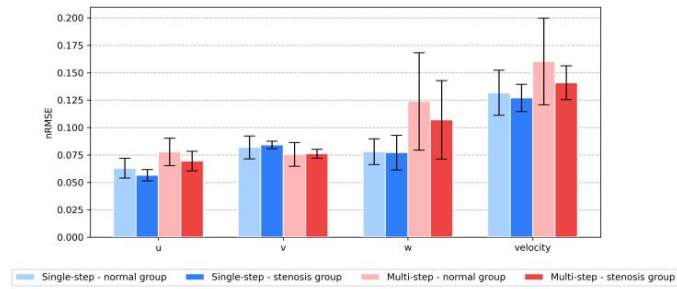

351

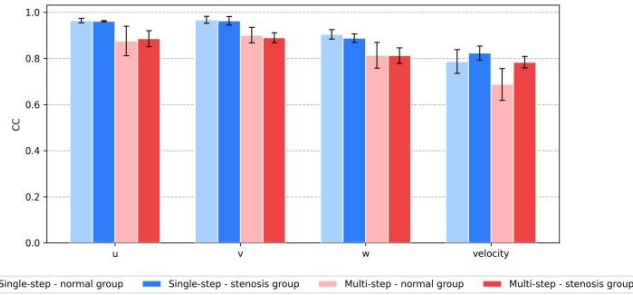

352 **Supplementary Fig. 15. | Comparison of the model's accuracy between the normal**  
353 **and stenosed groups in terms of nRMSE and correlation coefficient.**  
354

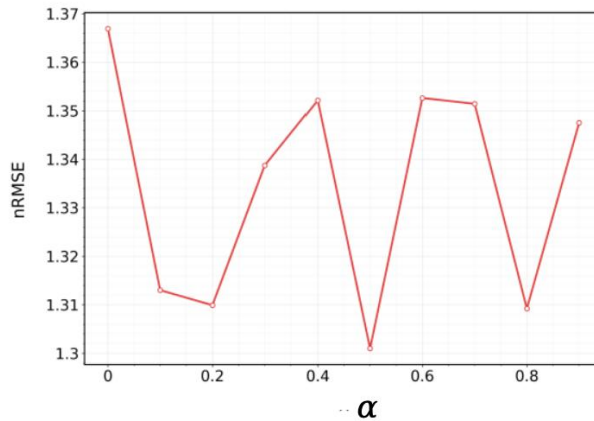

355

356 **Supplementary Fig. 16. | Impact of physics loss weight, using temporal**  
357 **extrapolation in single-step prediction task as the example.**

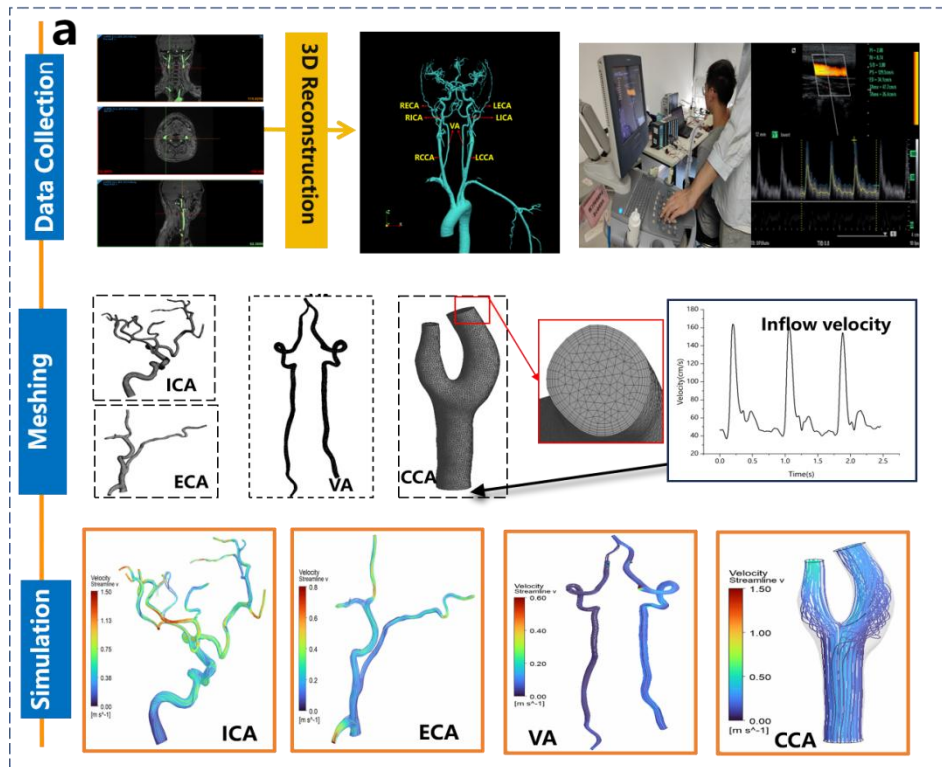

358  
 359  
 360  
 361  
 362  
 363  
 364

**Supplementary Fig. 17. | The workflow of construction process of the CFD dataset.** It includes the data collection, meshing and numerical simulation process. LCCA, left common carotid artery; RCCA, right common carotid artery; LICA, left internal carotid artery; RICA, right internal carotid artery; LECA, left external carotid artery; RECA, right external carotid artery; VA, Vertebral artery.

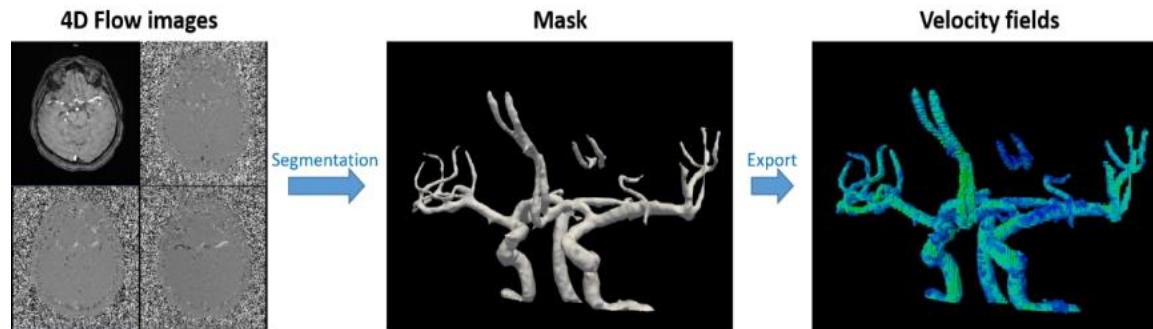

365  
 366  
 367  
 368  
 369  
 370  
 371  
 372  
 373  
 374  
 375

**Supplementary Fig. 18. | Post-processing of the 4D Flow images using iTFlow.**

376  
377

**Supplementary Tables**

Supplementary Table 1. Subject information

|                             | Total (N=40)     | Males (N=14)   | Females (N=26) |
|-----------------------------|------------------|----------------|----------------|
| Age (Years)                 | 49[32.5,58]      | 52.5[33,56]    | 45[32.5,60.5]  |
| SBP (mmHg)                  | 116[107.5,125.5] | 120.5[116,126] | 113[105,122]   |
| DBP (mmHg)                  | 74[67.5,80.5]    | 79[73,83]      | 69[66,80]      |
| Pulse rate (bpm)            | 69[63,74.5]      | 63.5[59,71]    | 70[66,80]      |
| Carotid artery stenosis (n) | 7                | 4              | 3              |

378

379 Supplementary Table 2. Prediction Performance (mean+/-std) for single-step prediction

380

task on temporal extrapolation

| Vessel Site | Metrics                 | Models       | p (10 <sup>-2</sup> ) | u(10 <sup>-2</sup> ) | v(10 <sup>-2</sup> ) | w(10 <sup>-2</sup> ) | velocity                      |
|-------------|-------------------------|--------------|-----------------------|----------------------|----------------------|----------------------|-------------------------------|
|             |                         |              |                       |                      |                      |                      | magnitude (10 <sup>-2</sup> ) |
| Overall     | nRMSE                   | 4DHemoFormer | 6.30±2.20             | 0.76±0.17            | 0.70±0.16            | 1.20±0.30            | 1.70±0.39                     |
|             |                         | PINN         | 7.30±5.30             | 3.10±1.20            | 2.80±0.71            | 2.80±0.71            | 6.80±2.30                     |
|             |                         | DeepONet     | 7.82±6.27             | 2.80±0.75            | 2.60±0.47            | 4.50±0.82            | 6.00±1.70                     |
|             |                         | FNO          | 8.39±6.84             | 3.30±0.45            | 3.20±0.45            | 4.60±0.74            | 6.20±1.50                     |
|             | Correlation coefficient | 4DHemoFormer | 80.06±13.26           | 91.74±3.53           | 91.90±3.39           | 92.73±2.00           | 92.44±2.12                    |
|             |                         | PINN         | 74.47±13.59           | 78.27±13.9           | 78.03±20.89          | 78.36±15.8           | 69.08±17.90                   |
|             | nRMSE                   | DeepONet     | 78.27±14.59           | 87.25±15.9           | 85.85±11.06          | 89.41±19.2           | 85.25±9.21                    |
|             |                         | FNO          | 76.29±18.73           | 86.87±22.1           | 86.58±11.95          | 87.72±13.6           | 83.94±8.86                    |
|             |                         | 4DHemoFormer | 8.00±1.71             | 0.90±0.28            | 1.31±0.28            | 2.24±0.54            | 2.87±0.61                     |
|             |                         | PINN         | 13.02±2.60            | 2.33±0.47            | 3.09±0.62            | 5.95±1.19            | 6.58±1.32                     |
| CCA         | nRMSE                   | DeepONet     | 18.94±3.28            | 3.95±0.73            | 3.79±0.78            | 7.09±0.74            | 7.97±1.15                     |
|             |                         | FNO          | 16.24±2.73            | 4.95±1.05            | 4.64±1.37            | 6.89±1.90            | 7.83±1.38                     |
|             | Correlation coefficient | 4DHemoFormer | 89.90±28.31           | 85.41±10.1           | 85.54±9.78           | 90.67±4.98           | 90.91±5.83                    |
|             |                         | PINN         | 72.65±24.43           | 63.45±9.52           | 48.04±7.21           | 57.49±8.62           | 49.23±7.39                    |
|             |                         | DeepONet     | 74.79±26.74           | 83.02±13.5           | 83.21±22.24          | 85.44±17.8           | 84.66±8.80                    |
|             |                         | FNO          | 59.87±5.49            | 82.89±9.64           | 83.58±17.04          | 88.56±12.5           | 87.72±19.39                   |
| ICA         | nRMSE                   | 4DHemoFormer | 0.50±0.20             | 0.70±0.15            | 0.24±0.14            | 0.94±0.26            | 0.52±0.34                     |
|             |                         | PINN         | 0.63±0.19             | 4.86±1.46            | 3.72±1.12            | 5.13±1.54            | 10.10±3.03                    |
|             |                         | DeepONet     | 12.88±2.99            | 1.90±0.52            | 1.54±0.31            | 2.64±0.55            | 3.51±0.44                     |

|     |                         |              |             |            |             |            |             |
|-----|-------------------------|--------------|-------------|------------|-------------|------------|-------------|
|     |                         | FNO          | 17.43±2.34  | 1.95±0.24  | 1.59±0.45   | 2.78±0.64  | 3.72±0.76   |
|     |                         | 4DHemoFormer | 90.57±6.39  | 95.76±1.92 | 96.43±1.41  | 95.77±1.34 | 95.92±1.02  |
|     |                         | PINN         | 88.92±4.45  | 71.46±3.57 | 89.25±4.46  | 86.17±4.31 | 73.02±3.65  |
|     | Correlation coefficient | DeepONet     | 85.48±16.60 | 86.36±17.1 | 86.54±22.79 | 86.37±17.2 | 86.31±21.58 |
|     |                         |              |             | 5          |             | 8          |             |
|     |                         | FNO          | 85.52±24.67 | 89.60±26.4 | 89.78±13.94 | 89.52±23.6 | 89.54±21.17 |
|     |                         |              |             | 0          |             | 0          |             |
|     |                         | 4DHemoFormer | 7.34±3.97   | 0.82±0.18  | 0.63±0.15   | 0.99±0.26  | 2.07±0.41   |
|     | nRMSE                   | PINN         | 7.40±2.22   | 2.71±0.81  | 2.23±0.67   | 3.23±0.97  | 5.49±1.65   |
|     |                         | DeepONet     | 92.25±27.25 | 2.94±0.87  | 2.64±0.78   | 3.83±1.13  | 6.79±2.00   |
|     |                         | FNO          | 56.55±14.19 | 3.00±0.67  | 3.02±0.60   | 3.92±0.73  | 7.09±1.82   |
| ECA |                         | 4DHemoFormer | 58.72±12.94 | 88.96±1.38 | 88.78±1.68  | 87.64±1.22 | 86.40±1.17  |
|     |                         | PINN         | 57.47±2.87  | 82.48±4.12 | 80.11±4.01  | 75.52±3.78 | 62.45±3.12  |
|     | Correlation coefficient | DeepONet     | 54.52±22.49 | 89.29±23.7 | 88.92±23.66 | 89.37±23.7 | 88.65±23.59 |
|     |                         |              |             | 6          |             | 9          |             |
|     |                         | FNO          | 56.72±16.74 | 88.30±14.3 | 87.80±14.21 | 88.10±19.4 | 87.77±12.96 |
|     |                         |              |             | 4          |             | 5          |             |
|     |                         | 4DHemoFormer | 9.27±2.78   | 0.63±0.09  | 0.61±0.09   | 0.82±0.14  | 1.40±0.22   |
|     | nRMSE                   | PINN         | 10.26±3.08  | 2.68±0.80  | 2.27±0.68   | 2.74±0.82  | 5.02±1.51   |
|     |                         | DeepONet     | 42.85±8.11  | 0.94±0.17  | 0.97±0.14   | 1.75±0.19  | 2.53±0.66   |
|     |                         | FNO          | 28.52±3.80  | 1.44±0.19  | 1.70±0.23   | 2.13±0.28  | 3.27±0.44   |
| VA  |                         | 4DHemoFormer | 81.05±5.39  | 96.85±0.66 | 96.83±0.68  | 96.84±0.46 | 96.51±0.46  |
|     |                         | PINN         | 80.90±4.05  | 95.69±0.13 | 94.73±0.14  | 94.25±0.40 | 91.61±4.58  |
|     | Correlation coefficient | DeepONet     | 84.12±13.73 | 86.06±9.74 | 86.06±25.77 | 85.89±9.08 | 85.76±17.38 |
|     |                         | FNO          | 62.63±13.69 | 84.80±18.5 | 84.51±18.47 | 84.47±18.4 | 84.19±18.40 |
|     |                         |              |             | 3          |             | 6          |             |

381

382 Supplementary Table 3. Prediction Performance (mean+/-std) for multi-step prediction

383 task on temporal extrapolation

| Vessel Site | Metrics     | Models       | p (10 <sup>-3</sup> ) | u(10 <sup>-2</sup> ) | v(10 <sup>-2</sup> ) | w(10 <sup>-2</sup> ) | velocity magnitude (10 <sup>-2</sup> ) |
|-------------|-------------|--------------|-----------------------|----------------------|----------------------|----------------------|----------------------------------------|
|             |             | 4DHemoFormer | 266.73±264.4          | 6.07±3.50            | 5.51±3.30            | 9.27±5.55            | 13.28±8.17                             |
|             |             |              | 0                     |                      |                      |                      |                                        |
|             |             | PINN         | 468.15±774.1          | 7.93±4.13            | 7.40±4.46            | 11.80±9.29           | 17.49±10.86                            |
|             | nRMSE       |              | 7                     |                      |                      |                      |                                        |
|             |             | DeepONet     | 796.03±558.8          | 9.24±3.66            | 9.57±3.48            | 16.14±7.81           | 25.32±12.68                            |
|             |             |              | 4                     |                      |                      |                      |                                        |
|             |             | FNO          | 831.98±681.0          | 10.18±3.68           | 10.41±4.78           | 18.31±9.59           | 28.59±16.92                            |
|             |             |              | 2                     |                      |                      |                      |                                        |
|             |             | 4DHemoFormer | 66.95±13.85           | 94.85±3.56           | 95.14±3.56           | 97.38±2.45           | 97.36±2.36                             |
|             | Correlation | PINN         | 75.25±37.82           | 94.58±6.98           | 94.83±7.00           | 96.54±2.97           | 95.66±2.78                             |

|     |                         |              |              |            |             |            |             |
|-----|-------------------------|--------------|--------------|------------|-------------|------------|-------------|
|     | coefficient             | DeepONet     | 62.15±23.46  | 93.23±4.57 | 93.37±4.38  | 94.58±3.99 | 94.37±3.27  |
|     |                         | FNO          | 59.34±12.57  | 91.85±4.56 | 91.14±4.56  | 93.53±3.99 | 92.48±3.25  |
|     |                         | 4DHemoFormer | 781.91±813.4 | 8.75±4.80  | 8.31±4.05   | 16.68±9.10 | 19.41±11.06 |
|     |                         |              | 3            |            |             |            |             |
|     |                         | PINN         | 1628.00±1481 | 12.72±5.20 | 12.60±5.43  | 24.86±10.9 | 30.31±13.64 |
|     |                         |              | .50          |            |             | 1          |             |
|     | nRMSE                   | DeepONet     | 1981.96±1843 | 12.55±4.28 | 13.54±4.15  | 27.72±8.95 | 37.29±17.61 |
|     |                         |              | .38          |            |             |            |             |
| CCA |                         | FNO          | 2056.48±1628 | 13.44±4.50 | 14.75±5.62  | 32.00±9.56 | 42.72±16.40 |
|     |                         |              | .30          |            |             |            |             |
|     |                         | 4DHemoFormer | 7.75±18.38   | 85.52±10.2 | 86.42±10.32 | 94.38±6.74 | 94.32±6.65  |
|     |                         |              | 3            |            |             |            |             |
|     | Correlation coefficient | PINN         | 19.11±33.77  | 84.16±8.38 | 84.36±8.56  | 92.22±5.28 | 91.53±6.91  |
|     |                         | DeepONet     | 17.58±17.46  | 82.39±9.83 | 82.03±9.06  | 90.96±6.14 | 90.14±6.15  |
|     |                         | FNO          | 16.41±27.77  | 81.22±9.19 | 83.11±10.14 | 87.47±5.03 | 87.08±6.74  |
|     |                         | 4DHemoFormer | 27.77±22.82  | 3.81±1.96  | 3.39±2.07   | 6.22±3.88  | 8.15±5.17   |
|     | nRMSE                   | PINN         | 35.45±36.20  | 5.43±2.93  | 4.97±2.84   | 7.61±4.83  | 11.68±7.57  |
|     |                         | DeepONet     | 41.31±26.54  | 5.39±1.27  | 5.58±1.30   | 8.51±3.54  | 13.69±4.45  |
|     |                         | FNO          | 44.52±23.61  | 5.96±1.15  | 6.06±2.04   | 9.05±3.73  | 15.55±5.29  |
| ICA |                         | 4DHemoFormer | 93.59±10.52  | 97.62±1.86 | 98.16±1.40  | 98.17±1.35 | 98.59±0.98  |
|     | Correlation coefficient | PINN         | 97.59±6.88   | 97.42±1.88 | 98.07±1.48  | 97.28±1.94 | 97.59±1.82  |
|     |                         | DeepONet     | 91.73±8.47   | 93.88±1.86 | 92.09±1.41  | 94.98±1.59 | 94.80±1.27  |
|     |                         | FNO          | 84.54±6.34   | 87.46±1.86 | 91.10±1.36  | 92.52±1.79 | 92.31±1.58  |
|     |                         | 4DHemoFormer | 194.53±164.0 | 8.75±5.67  | 7.54±5.50   | 9.47±6.61  | 18.50±12.03 |
|     |                         |              | 0            |            |             |            |             |
|     | nRMSE                   | PINN         | 128.99±84.61 | 9.90±5.25  | 9.41±5.05   | 11.32±6.29 | 22.09±12.02 |
|     |                         | DeepONet     | 149.39±71.60 | 10.18±5.03 | 10.22±5.18  | 12.22±6.85 | 26.14±18.05 |
| ECA |                         | FNO          | 167.56±83.38 | 11.60±5.58 | 11.07±5.14  | 13.58±6.53 | 28.68±13.04 |
|     |                         | 4DHemoFormer | 80.41±16.00  | 97.29±1.41 | 96.99±1.76  | 97.80±1.15 | 97.34±1.23  |
|     | Correlation coefficient | PINN         | 86.34±13.47  | 97.67±1.41 | 97.84±1.54  | 97.67±1.43 | 96.83±1.97  |
|     |                         | DeepONet     | 74.16±14.55  | 92.23±1.41 | 97.77±1.74  | 93.72±1.05 | 92.91±1.33  |
|     |                         | FNO          | 72.85±13.19  | 97.47±1.41 | 94.32±1.63  | 92.80±1.18 | 91.96±1.19  |
|     |                         | 4DHemoFormer | 62.70±57.34  | 2.96±1.57  | 2.79±1.58   | 4.69±2.61  | 7.08±4.42   |
|     | nRMSE                   | PINN         | 80.17±36.65  | 3.66±1.15  | 2.63±1.20   | 3.41±1.69  | 5.90±2.11   |
|     |                         | DeepONet     | 90.67±32.04  | 3.56±1.66  | 2.86±1.07   | 3.96±1.26  | 7.13±2.51   |
|     |                         | FNO          | 109.09±47.92 | 4.11±1.17  | 3.14±1.44   | 4.52±1.28  | 8.13±2.60   |
| VA  |                         | 4DHemoFormer | 86.05±10.49  | 98.99±0.74 | 98.97±0.76  | 99.17±0.55 | 99.19±0.58  |
|     | Correlation coefficient | PINN         | 97.98±2.35   | 99.07±0.80 | 99.05±0.82  | 98.99±0.84 | 96.68±1.28  |
|     |                         | DeepONet     | 77.06±3.71   | 89.02±0.74 | 92.03±0.82  | 93.08±0.59 | 87.63±0.63  |
|     |                         | FNO          | 72.14±3.50   | 82.05±0.79 | 89.00±0.78  | 90.08±0.77 | 90.10±0.76  |

384

385 Supplementary Table 4. Prediction Performance (mean+/-std) for single-step prediction

386 task on cross-geometry generalization

| Vessel Site   | Metrics                 | Models       | p (10 <sup>-2</sup> ) | u(10 <sup>-2</sup> ) | v(10 <sup>-2</sup> ) | w(10 <sup>-2</sup> ) | velocity                      |
|---------------|-------------------------|--------------|-----------------------|----------------------|----------------------|----------------------|-------------------------------|
|               |                         |              |                       |                      |                      |                      | magnitude (10 <sup>-2</sup> ) |
| Overall       | nRMSE                   | 4DHemoFormer | 8.25±2.24             | 0.93±0.24            | 0.81±0.23            | 1.65±0.45            | 2.39±0.56                     |
|               |                         | PINN         | 12.62±5.29            | 3.54±0.50            | 3.43±0.47            | 5.25±2.06            | 7.34±1.81                     |
|               |                         | DeepONet     | 89.19±19.11           | 2.42±0.44            | 2.43±0.41            | 7.90±1.34            | 8.85±1.74                     |
|               |                         | FNO          | 165.46±34.29          | 5.40±0.87            | 6.09±0.86            | 7.94±1.12            | 10.46±2.46                    |
|               |                         | 4DHemoFormer | 70.09±23.14           | 89.46±6.19           | 90.73±6.14           | 89.33±4.4            | 88.95±5.09                    |
|               | Correlation coefficient | 4DHemoFormer |                       |                      |                      | 4                    |                               |
|               |                         | PINN         | 67.67±12.55           | 68.92±22.6           | 69.84±21.49          | 74.88±10.            | 59.07±14.88                   |
|               |                         |              |                       | 4                    |                      | 43                   |                               |
|               |                         | DeepONet     | 69.07±13.06           | 85.08±13.4           | 84.87±14.39          | 84.44±11.            | 84.28±14.36                   |
|               |                         | FNO          | 31.85±4.31            | 72.18±10.1           | 71.17±10.81          | 77.70±11.            | 75.51±9.64                    |
| T1:<br>VA-CG  | nRMSE                   | 4DHemoFormer | 8.32±2.19             | 0.95±0.35            | 0.88±0.34            | 1.77±0.75            | 2.34±0.88                     |
|               |                         | PINN         | 13.26±2.39            | 4.17±0.42            | 3.98±1.05            | 7.44±0.98            | 10.34±2.70                    |
|               |                         | DeepONet     | 34.02±4.67            | 1.27±0.27            | 1.36±0.39            | 2.77±0.57            | 3.87±0.50                     |
|               |                         | FNO          | 69.32±16.59           | 2.09±0.59            | 2.52±0.73            | 3.59±0.52            | 5.02±1.20                     |
|               |                         | 4DHemoFormer | 55.93±30.45           | 85.66±12.0           | 85.66±10.40          | 85.16±7.8            | 85.19±8.46                    |
|               | Correlation coefficient | 4DHemoFormer |                       | 6                    |                      | 6                    |                               |
|               |                         | PINN         | 71.04±1.49            | 68.48±0.92           | 68.31±6.50           | 76.33±3.5            | 45.13±6.83                    |
|               |                         |              |                       |                      |                      | 9                    |                               |
|               |                         | DeepONet     | 54.84±6.43            | 77.11±24.7           | 76.93±24.55          | 77.11±25.            | 76.29±24.74                   |
|               |                         | FNO          | 40.40±4.41            | 75.16±18.9           | 73.98±13.52          | 73.42±10.            | 73.54±12.76                   |
| T2:<br>CCA-CG | nRMSE                   | 4DHemoFormer | 6.16±4.51             | 1.00±0.21            | 0.63±0.24            | 1.22±0.31            | 1.67±0.56                     |
|               |                         | PINN         | 19.95±5.79            | 3.52±0.78            | 4.19±1.00            | 8.42±1.45            | 7.52±1.21                     |
|               |                         | DeepONet     | 219.77±56.61          | 3.34±0.94            | 3.23±0.68            | 9.61±2.38            | 10.17±1.57                    |
|               |                         | FNO          | 507.12±90.14          | 4.98±0.91            | 4.46±1.25            | 7.42±1.37            | 8.13±2.26                     |
|               |                         | 4DHemoFormer | 65.71±20.73           | 88.36±2.87           | 89.99±2.81           | 88.54±1.4            | 87.57±4.60                    |
|               | Correlation coefficient | 4DHemoFormer |                       |                      |                      | 6                    |                               |
|               |                         | PINN         | 51.18±2.14            | 52.80±1.47           | 37.61±2.16           | 60.97±1.0            | 57.41±2.14                    |
|               |                         |              |                       |                      |                      | 1                    |                               |
|               |                         | DeepONet     | 57.94±6.22            | 83.41±16.1           | 83.41±11.18          | 85.42±14.            | 85.34±11.66                   |
|               |                         | FNO          | 28.47±3.42            | 82.97±10.9           | 80.97±12.71          | 83.87±16.            | 83.84±20.38                   |
| T3:<br>ECA_CG | nRMSE                   | 4DHemoFormer | 7.30±1.30             | 0.88±0.32            | 0.83±0.27            | 1.69±0.65            | 1.94±0.70                     |
|               |                         | PINN         | 15.98±1.44            | 3.37±0.90            | 3.24±0.83            | 4.34±0.91            | 7.80±2.06                     |
|               |                         | DeepONet     | 37.53±9.35            | 2.55±0.68            | 2.40±0.25            | 5.49±1.37            | 8.32±0.84                     |
|               |                         | FNO          | 161.17±46.55          | 3.64±0.78            | 5.27±0.96            | 7.21±2.08            | 9.34±1.84                     |
|               |                         | 4DHemoFormer | 75.28±35.85           | 90.29±10.7           | 89.77±11.10          | 90.46±8.2            | 90.64±8.55                    |
|               | Correlation             | 4DHemoFormer |                       |                      |                      | 6                    |                               |
|               |                         |              |                       |                      |                      | 3                    |                               |
|               |                         |              |                       |                      |                      | 62                   |                               |
|               |                         |              |                       |                      |                      | 6                    |                               |
|               |                         |              |                       |                      |                      | 85                   |                               |

|        |             |              |              |            |             |           |             |
|--------|-------------|--------------|--------------|------------|-------------|-----------|-------------|
|        | coefficient |              | 4            |            | 4           |           |             |
|        |             | PINN         | 60.55±17.64  | 71.28±7.59 | 67.22±7.45  | 73.43±4.7 | 55.21±9.19  |
|        |             |              |              |            |             | 5         |             |
|        |             | DeepONet     | 70.06±14.29  | 86.85±20.0 | 86.30±13.09 | 85.76±15. | 84.64±21.52 |
|        |             |              |              | 6          |             | 58        |             |
|        |             | FNO          | 35.45±8.20   | 83.45±15.6 | 84.82±23.73 | 80.43±19. | 86.80±24.70 |
|        |             |              |              | 6          |             | 57        |             |
|        |             | 4DHemoFormer | 10.17±1.71   | 0.85±0.34  | 0.96±0.32   | 1.98±0.74 | 2.85±0.83   |
|        | nRMSE       | PINN         | 7.04±4.14    | 3.82±1.04  | 2.87±0.78   | 4.12±0.96 | 7.02±1.88   |
|        |             | DeepONet     | 11.66±2.04   | 1.81±0.33  | 1.45±0.15   | 3.05±0.88 | 3.71±0.55   |
|        |             | FNO          | 36.85±4.50   | 7.54±1.21  | 7.40±2.16   | 8.42±1.49 | 12.31±2.69  |
|        |             | 4DHemoFormer | 68.57±46.79  | 87.50±10.4 | 86.93±10.83 | 87.40±7.9 | 86.80±7.92  |
| T4:    |             |              |              | 5          |             | 5         |             |
| ICA.CG |             | PINN         | 80.42±6.51   | 83.92±2.84 | 81.47±5.00  | 70.96±6.3 | 61.45±5.76  |
|        | Correlation |              |              |            |             | 8         |             |
|        |             | DeepONet     | 55.61±23.87  | 76.24±13.1 | 77.18±18.45 | 76.24±19. | 76.44±10.38 |
|        |             |              |              | 6          |             | 58        |             |
|        |             | FNO          | 34.46±10.01  | 70.15±11.0 | 59.85±11.86 | 75.56±14. | 65.71±15.89 |
|        |             |              |              | 9          |             | 80        |             |
|        |             | 4DHemoFormer | 7.22±2.54    | 0.90±0.34  | 0.82±0.28   | 2.14±0.63 | 3.18±0.70   |
|        | nRMSE       | PINN         | 15.27±3.37   | 3.09±0.34  | 3.60±0.93   | 7.33±1.13 | 8.90±0.97   |
|        |             | DeepONet     | 119.18±16.75 | 2.28±0.32  | 2.07±0.29   | 18.02±2.5 | 14.79±2.08  |
|        |             |              |              |            |             | 3         |             |
|        |             | FNO          | 125.92±16.40 | 7.72±1.35  | 7.87±2.01   | 10.15±1.1 | 10.85±1.54  |
|        |             |              |              |            |             | 8         |             |
| T5:    |             | 4DHemoFormer | 75.45±25.17  | 82.38±11.0 | 91.70±10.91 | 82.07±7.7 | 84.01±8.67  |
| CCA_CS |             |              |              | 6          |             | 7         |             |
|        | Correlation | PINN         | 63.49±5.26   | 21.84±21.7 | 40.87±29.83 | 61.28±18. | 33.58±26.63 |
|        | coefficient |              |              | 4          |             | 46        |             |
|        |             | DeepONet     | 68.17±14.57  | 85.61±17.8 | 84.42±17.60 | 85.83±17. | 85.19±17.74 |
|        |             |              |              | 2          |             | 86        |             |
|        |             | FNO          | 19.98±5.99   | 42.14±12.6 | 52.55±15.74 | 86.57±25. | 77.68±23.27 |
|        |             |              |              | 2          |             | 93        |             |
|        |             | 4DHemoFormer | 3.45±0.95    | 0.70±0.10  | 0.67±0.07   | 0.94±0.12 | 1.52±0.18   |
|        | nRMSE       | PINN         | 3.62±1.09    | 4.33±1.30  | 2.86±0.86   | 3.33±1.00 | 6.23±1.87   |
|        |             | DeepONet     | 3.68±0.39    | 1.24±0.19  | 0.73±0.19   | 2.13±0.28 | 2.12±0.37   |
|        |             | FNO          | 10.88±1.82   | 2.18±0.52  | 1.47±0.39   | 4.66±0.96 | 3.41±0.47   |
| T6:    |             | 4DHemoFormer | 89.36±1.33   | 96.33±0.87 | 96.29±1.09  | 96.63±0.9 | 96.69±0.61  |
| ICA_CS |             |              |              |            |             | 2         |             |
|        | Correlation | PINN         | 86.59±4.33   | 74.34±6.77 | 89.60±0.97  | 85.54±4.2 | 70.43±3.52  |
|        | coefficient |              |              |            |             | 8         |             |
|        |             | DeepONet     | 76.56±24.01  | 87.03±24.1 | 87.18±24.16 | 87.53±24. | 86.91±24.10 |
|        |             |              |              | 3          |             | 25        |             |
|        |             | FNO          | 63.72±8.50   | 85.11±12.6 | 85.09±12.68 | 84.89±11. | 73.77±12.51 |

|                            |                            |              | 9            | 32         |             |           |             |            |
|----------------------------|----------------------------|--------------|--------------|------------|-------------|-----------|-------------|------------|
| T7:<br>ECA_CS              | nRMSE                      | 4DHemoFormer | 9.20±3.28    | 1.18±0.19  | 0.85±0.18   | 1.63±0.21 | 2.93±0.39   |            |
|                            |                            | PINN         | 12.86±1.32   | 3.02±1.03  | 3.22±0.96   | 3.30±0.89 | 7.14±1.70   |            |
|                            |                            | DeepONet     | 87.64±11.79  | 3.28±0.37  | 3.23±0.41   | 4.97±0.72 | 9.27±0.98   |            |
|                            |                            | FNO          | 53.37±9.24   | 4.91±0.60  | 7.09±2.01   | 7.73±0.94 | 12.34±3.03  |            |
|                            | Correlation<br>coefficient | 4DHemoFormer | 61.00±4.99   | 88.36±1.05 | 88.56±1.49  | 88.74±0.9 | 85.44±1.44  |            |
|                            |                            | PINN         | 57.91±9.31   | 82.77±0.99 | 78.44±2.63  | 76.08±1.3 | 61.08±2.90  |            |
|                            |                            | DeepONet     | 55.98±14.23  | 76.38±9.84 | 87.07±21.81 | 86.89±26. | 85.32±17.59 |            |
|                            |                            | FNO          | 23.87±4.58   | 73.06±17.8 | 81.98±15.73 | 83.91±16. | 83.29±15.98 |            |
|                            | T8: VA_CS                  | nRMSE        | 4DHemoFormer | 14.15±1.43 | 0.96±0.10   | 0.89±0.11 | 1.86±0.18   | 2.71±0.26  |
|                            |                            |              | PINN         | 12.95±2.34 | 3.00±0.98   | 3.49±0.46 | 3.76±0.69   | 3.76±1.67  |
|                            |                            |              | DeepONet     | 25.01±5.74 | 1.45±0.19   | 3.08±0.90 | 3.54±0.99   | 6.48±1.26  |
|                            |                            |              | FNO          | 57.92±9.12 | 6.40±1.37   | 8.56±0.73 | 9.81±2.39   | 13.88±2.05 |
| Correlation<br>coefficient |                            | 4DHemoFormer | 69.46±19.77  | 96.83±0.46 | 96.92±0.50  | 96.62±0.4 | 96.28±0.43  |            |
|                            |                            | PINN         | 70.18±1.40   | 95.91±0.19 | 95.17±0.12  | 94.46±0.4 | 88.26±5.61  |            |
|                            |                            | DeepONet     | 69.30±12.90  | 97.04±14.0 | 95.83±13.84 | 96.33±13. | 86.30±13.91 |            |
|                            |                            | FNO          | 39.77±11.21  | 51.84±14.7 | 39.64±4.54  | 39.55±4.2 | 29.10±2.92  |            |

387

388 Supplementary Table 5. Prediction Performance (mean+/-std) for multi-step prediction

389 task on cross-geometry generalization

| Vessel<br>Site | Metrics                    | Models       |                       |                      |                      |                      | velocity                         |
|----------------|----------------------------|--------------|-----------------------|----------------------|----------------------|----------------------|----------------------------------|
|                |                            |              | p (10 <sup>-2</sup> ) | u(10 <sup>-2</sup> ) | v(10 <sup>-2</sup> ) | w(10 <sup>-2</sup> ) | magnitude<br>(10 <sup>-2</sup> ) |
| Overall        | nRMSE                      | 4DHemoFormer | 180.73±174.7          | 6.10±3.77            | 6.30±3.61            | 10.23±6.27           | 13.61±8.26                       |
|                |                            | PINN         | 310.94±476.3          | 7.76±4.33            | 7.26±4.50            | 11.26±9.06           | 16.23±9.60                       |
|                |                            | DeepONet     | 409.42±356.4          | 8.65±3.56            | 9.68±3.81            | 16.10±6.86           | 22.00±7.66                       |
|                |                            | FNO          | 435.20±252.6          | 9.32±4.31            | 10.84±4.42           | 17.31±7.90           | 24.73±8.55                       |
|                |                            | 4DHemoFormer | 51.37±15.04           | 81.89±4.86           | 82.01±4.19           | 84.68±2.84           | 84.33±3.36                       |
|                | Correlation<br>coefficient | PINN         | 81.93±25.57           | 95.13±6.21           | 95.38±6.00           | 96.99±2.40           | 96.11±2.17                       |
|                |                            | DeepONet     | 63.89±19.48           | 82.10±5.62           | 81.81±4.25           | 81.87±3.78           | 82.67±4.43                       |

|        |             |              |              |            |            |            |             |
|--------|-------------|--------------|--------------|------------|------------|------------|-------------|
|        |             | FNO          | 63.81±23.85  | 86.27±5.56 | 87.41±5.54 | 85.86±4.69 | 87.76±3.76  |
|        |             | 4DHemoFormer | 224.85±265.5 | 6.88±4.18  | 7.11±4.40  | 12.53±8.80 | 15.96±10.93 |
|        |             |              | 8            |            |            |            |             |
|        |             | PINN         | 50.40±0.69   | 2.63±0.25  | 2.87±0.17  | 3.78±0.15  | 6.26±0.22   |
| T1:    | nRMSE       | DeepONet     | 62.20±32.61  | 2.56±1.96  | 3.10±1.38  | 4.36±2.73  | 7.83±3.18   |
| VA-CG  |             | FNO          | 64.70±23.46  | 2.79±1.46  | 3.31±1.06  | 4.74±2.25  | 8.18±4.53   |
|        |             | 4DHemoFormer | 44.93±17.44  | 92.88±5.50 | 92.68±5.01 | 96.05±2.95 | 96.10±3.00  |
|        | Correlation | PINN         | 98.13±0.25   | 99.08±0.04 | 98.98±0.15 | 98.97±0.03 | 98.31±0.53  |
|        | coefficient | DeepONet     | 61.99±7.95   | 88.12±4.78 | 90.66±0.14 | 89.31±2.42 | 93.69±2.34  |
|        |             | FNO          | 56.62±0.24   | 93.02±3.45 | 87.76±1.56 | 92.36±0.03 | 94.05±2.51  |
|        |             | 4DHemoFormer | 69.05±49.86  | 4.62±2.04  | 4.35±1.60  | 7.44±3.79  | 11.50±5.92  |
|        |             | PINN         | 1167.50±515. | 14.57±5.58 | 14.31±4.46 | 26.47±7.60 | 31.82±9.49  |
|        |             |              | 89           |            |            |            |             |
|        | nRMSE       | DeepONet     | 1207.35±96.5 | 11.99±6.71 | 17.62±6.76 | 31.08±9.84 | 33.85±9.59  |
| T2:    |             |              | 2            |            |            |            |             |
| CCA-CG |             | FNO          | 1819.12±84.4 | 13.12±7.45 | 19.78±5.16 | 31.85±9.82 | 37.44±9.46  |
|        |             |              | 1            |            |            |            |             |
|        |             | 4DHemoFormer | 7.40±15.51   | 93.93±3.44 | 95.24±2.53 | 94.72±2.39 | 93.11±2.87  |
|        | Correlation | PINN         | 48.35±22.42  | 85.35±5.60 | 86.93±5.22 | 93.60±2.78 | 92.92±3.29  |
|        | coefficient | DeepONet     | 55.46±14.24  | 80.01±3.67 | 90.79±2.32 | 91.04±2.65 | 90.10±2.68  |
|        |             | FNO          | 35.62±20.27  | 86.75±5.52 | 87.79±2.64 | 88.47±2.59 | 85.05±3.12  |
|        |             | 4DHemoFormer | 237.10±240.5 | 6.53±4.14  | 6.42±3.54  | 11.23±6.74 | 12.72±6.83  |
|        |             |              | 4            |            |            |            |             |
|        | nRMSE       | PINN         | 159.28±92.94 | 10.72±4.74 | 9.51±4.33  | 11.64±5.19 | 22.34±10.55 |
|        |             | DeepONet     | 183.13±82.08 | 10.96±5.85 | 10.11±5.46 | 12.91±4.25 | 27.64±9.95  |
| T3:    |             | FNO          | 204.42±95.19 | 11.66±7.99 | 11.49±6.56 | 13.98±5.78 | 30.11±18.46 |
| ECA_CG |             | 4DHemoFormer | 63.02±10.39  | 91.31±7.15 | 90.44±5.84 | 95.89±2.93 | 94.64±4.12  |
|        | Correlation | PINN         | 92.76±5.70   | 97.64±0.73 | 97.50±1.10 | 97.65±0.86 | 96.16±1.15  |
|        | coefficient | DeepONet     | 62.79±6.58   | 90.41±3.26 | 85.03±1.16 | 93.07±2.32 | 92.90±3.86  |
|        |             | FNO          | 61.54±10.37  | 87.73±0.91 | 83.05±3.56 | 91.36±0.82 | 90.81±2.74  |
|        |             | 4DHemoFormer | 376.38±363.2 | 7.18±5.01  | 7.65±5.02  | 13.12±8.93 | 17.37±12.08 |
|        |             |              | 6            |            |            |            |             |
|        | nRMSE       | PINN         | 32.85±8.58   | 5.50±0.88  | 4.55±0.64  | 7.11±1.26  | 10.88±1.50  |
|        |             | DeepONet     | 47.74±10.13  | 3.55±1.31  | 3.78±1.81  | 7.25±4.14  | 5.78±2.99   |
| T4:    |             | FNO          | 52.51±13.52  | 4.14±1.48  | 4.37±1.82  | 8.29±4.86  | 6.39±3.67   |
| ICA_CG |             | 4DHemoFormer | 71.20±13.68  | 94.08±4.65 | 94.19±4.95 | 96.87±2.57 | 96.76±2.61  |
|        | Correlation | PINN         | 93.11±4.33   | 97.28±0.58 | 97.58±0.94 | 97.19±0.65 | 96.79±1.11  |
|        |             | DeepONet     | 75.39±9.70   | 92.97±4.01 | 93.50±3.77 | 93.06±2.38 | 92.78±2.19  |
|        |             | FNO          | 73.11±11.68  | 85.73±0.55 | 92.43±0.92 | 91.92±0.94 | 90.78±2.08  |
|        |             | 4DHemoFormer | 283.83±282.6 | 8.33±6.25  | 10.51±6.64 | 16.18±9.26 | 16.32±9.08  |
|        |             |              | 0            |            |            |            |             |
| T5:    | nRMSE       | PINN         | 876.50±768.0 | 10.08±4.82 | 10.30±5.10 | 21.67±10.3 | 22.46±11.70 |
| CCA_CS |             |              | 2            |            |            | 8          |             |
|        |             | DeepONet     | 1025.23±245. | 10.27±4.26 | 11.14±5.39 | 24.88±8.94 | 26.96±8.77  |

|           |             |              | 35           |            |             |            |             |
|-----------|-------------|--------------|--------------|------------|-------------|------------|-------------|
|           |             | FNO          | 1447.03±264. | 10.92±5.85 | 12.01±6.88  | 27.50±9.53 | 32.89±9.53  |
|           |             |              | 25           |            |             |            |             |
|           |             | 4DHemoFormer | 5.34±20.36   | 84.62±14.8 | 86.34±10.73 | 92.66±7.63 | 91.22±8.72  |
|           |             |              | 2            |            |             |            |             |
|           | Correlation | PINN         | 34.09±40.65  | 85.63±1.11 | 85.81±9.09  | 92.42±5.06 | 92.22±6.56  |
|           | coefficient | DeepONet     | 41.62±19.76  | 75.18±14.4 | 83.86±10.20 | 90.45±6.65 | 83.02±8.29  |
|           |             |              | 0            |            |             |            |             |
|           |             | FNO          | 36.65±18.53  | 83.03±6.48 | 82.10±9.21  | 88.60±7.27 | 92.17±8.04  |
|           |             | 4DHemoFormer | 25.24±18.34  | 3.62±2.13  | 2.88±1.50   | 4.62±2.84  | 6.58±4.08   |
|           | nRMSE       | PINN         | 26.29±26.77  | 4.16±1.95  | 3.28±1.58   | 4.69±2.26  | 7.34±3.61   |
|           |             | DeepONet     | 30.76±10.26  | 4.23±1.12  | 3.52±1.30   | 5.24±2.42  | 9.06±4.69   |
| T6:       |             | FNO          | 34.93±9.55   | 4.34±0.96  | 3.86±0.99   | 5.55±2.51  | 10.03±3.35  |
| ICA_CS    |             | 4DHemoFormer | 96.89±1.99   | 98.38±0.84 | 98.23±1.21  | 98.41±0.87 | 98.63±0.54  |
|           | Correlation | PINN         | 99.32±0.77   | 99.04±0.33 | 99.17±0.34  | 98.91±0.46 | 98.90±0.43  |
|           | coefficient | DeepONet     | 90.38±1.42   | 95.86±0.58 | 93.74±0.53  | 95.55±0.68 | 93.69±0.52  |
|           |             | FNO          | 91.98±0.83   | 92.73±0.34 | 96.07±0.39  | 92.45±0.45 | 90.68±0.46  |
|           |             | 4DHemoFormer | 183.97±148.4 | 8.42±5.30  | 8.39±4.83   | 10.95±7.90 | 20.21±13.91 |
|           |             |              | 7            |            |             |            |             |
|           | nRMSE       | PINN         | 117.05±64.39 | 9.98±5.40  | 9.71±5.43   | 10.46±5.33 | 19.95±9.97  |
|           |             | DeepONet     | 139.52±52.30 | 10.33±6.46 | 10.30±5.58  | 11.36±7.85 | 23.92±16.89 |
| T7:       |             | FNO          | 157.57±50.33 | 11.09±4.01 | 12.05±5.09  | 12.50±7.69 | 25.66±11.98 |
| ECA_CS    |             | 4DHemoFormer | 76.76±11.73  | 96.74±1.39 | 95.85±1.95  | 97.08±1.45 | 95.92±1.77  |
|           | Correlation | PINN         | 90.92±7.33   | 97.82±1.31 | 97.84±1.42  | 98.23±1.07 | 97.08±1.70  |
|           | coefficient | DeepONet     | 70.90±9.93   | 94.80±1.29 | 92.96±1.91  | 96.74±1.15 | 93.32±1.75  |
|           |             | FNO          | 73.85±7.89   | 92.63±1.35 | 88.23±1.93  | 93.10±1.42 | 92.40±1.71  |
|           |             | 4DHemoFormer | 45.39±29.15  | 3.17±1.11  | 3.07±1.30   | 5.74±1.90  | 8.22±3.21   |
|           | nRMSE       | PINN         | 57.62±14.41  | 4.41±1.69  | 3.51±1.45   | 4.26±2.04  | 8.88±3.62   |
|           |             | DeepONet     | 67.54±21.19  | 4.44±1.37  | 3.83±1.67   | 4.64±1.26  | 10.77±3.53  |
| T8: VA_CS |             | FNO          | 75.84±37.49  | 4.81±1.73  | 4.03±1.44   | 5.27±1.16  | 11.90±3.27  |
|           |             | 4DHemoFormer | 80.75±9.39   | 98.58±0.76 | 98.92±0.62  | 99.11±0.51 | 99.07±0.56  |
|           | Correlation | PINN         | 98.75±1.15   | 99.18±0.68 | 99.17±0.69  | 98.97±0.83 | 96.23±1.32  |
|           |             | DeepONet     | 74.40±8.81   | 92.90±0.69 | 92.01±0.63  | 94.09±0.71 | 92.32±1.26  |
|           |             | FNO          | 72.66±1.08   | 87.49±0.73 | 90.70±0.67  | 93.35±0.68 | 91.06±1.04  |

390

391 Supplementary Table 6. Prediction Performance (mean+/-std) of 4DHemoFormer for

392 cross-domain transferability in single-step and multi-step prediction task

| Vessel Site | Metrics           | Models      | Metrics | u(10 <sup>-2</sup> ) | v(10 <sup>-2</sup> ) | w(10 <sup>-2</sup> ) | velocity                      |
|-------------|-------------------|-------------|---------|----------------------|----------------------|----------------------|-------------------------------|
|             |                   |             |         |                      |                      |                      | magnitude (10 <sup>-2</sup> ) |
|             | Zero-shot setting | Single-step | nRMSE   | 8.19±1.03            | 7.80±1.19            | 13.16±2.04           | 6.28±0.91                     |
|             |                   |             | CC      | 96.72±1.53           | 90.45±2.06           | 78.72±5.12           | 96.43±0.94                    |

|                            |                           |       |            |            |            |            |
|----------------------------|---------------------------|-------|------------|------------|------------|------------|
| <b>Intracranial artery</b> |                           | nRMSE | 7.55±1.07  | 12.34±4.43 | 15.98±3.92 | 10.44±2.96 |
|                            | Multi-step                | CC    | 90.08±3.36 | 81.37±5.53 | 68.92±7.00 | 87.56±6.35 |
|                            | Fine-tuning setting (10%) | nRMSE | 2.21±0.66  | 2.40±0.730 | 2.45±0.61  | 3.51±0.88  |
|                            | Single-step               | CC    | 98.86±0.79 | 99.12±0.44 | 98.56±0.73 | 97.79±1.08 |
|                            | Multi-step                | nRMSE | 5.81±2.16  | 5.20±1.52  | 6.64±1.99  | 7.76±1.25  |
|                            |                           | CC    | 91.45±5.73 | 93.90±3.33 | 90.13±5.71 | 89.46±6.10 |

393

394 **Supplementary Table 7. Runtime of the models averaged on ICA, ECA, CCA and VA**

| <b>Single-step prediction task on CFD data</b> |                    |      |          |              |                                       |
|------------------------------------------------|--------------------|------|----------|--------------|---------------------------------------|
|                                                | Data-driven models |      |          |              | Numerical simulation<br>(each second) |
| Method                                         | PINN               | FNO  | DeepONet | 4DHemoFormer | -                                     |
| Training time (hours)                          | 0.4                | 10.1 | 50.6     | 18.5         | -                                     |
| Inference time (seconds)                       | 10.5               | 0.8  | 31.4     | 24.6         | 415.43*                               |

| <b>Multi-step prediction task on CFD data</b> |                    |      |          |              |                                       |
|-----------------------------------------------|--------------------|------|----------|--------------|---------------------------------------|
|                                               | Data-driven models |      |          |              | Numerical simulation<br>(each second) |
| Method                                        | PINN               | FNO  | DeepONet | 4DHemoFormer | -                                     |
| Training time (hours)                         | 0.2                | 12.1 | 76.0     | 11.2         | -                                     |
| Inference time (seconds)                      | 8.7                | 1.0  | 102.7    | 23.5         | 415.43*                               |

395

| <b>Single-step prediction task on in-vivo data</b> |                    |      |          |              |                  |
|----------------------------------------------------|--------------------|------|----------|--------------|------------------|
|                                                    | Data-driven models |      |          |              | Acquisition time |
| Method                                             | PINN               | FNO  | DeepONet | 4DHemoFormer | -                |
| Training time (hours)                              | 0.2                | 40.0 | 151.8    | 7.0          | -                |
| Inference time (seconds)                           | 2.3                | 0.8  | 23.5     | 4.8          | 575              |

| <b>Multi-step prediction task on in-vivo data</b> |                    |      |          |              |                  |
|---------------------------------------------------|--------------------|------|----------|--------------|------------------|
|                                                   | Data-driven models |      |          |              | Acquisition time |
| Method                                            | PINN               | FNO  | DeepONet | 4DHemoFormer | -                |
| Training time (hours)                             | 0.1                | 48.0 | 305.0    | 7.0          | -                |

|                             |     |     |      |     |     |
|-----------------------------|-----|-----|------|-----|-----|
| Inference time<br>(seconds) | 1.8 | 0.9 | 77.0 | 6.5 | 575 |
|-----------------------------|-----|-----|------|-----|-----|

396

397 Supplementary Table 8. Parameters settings for 4DHemoFormer and baseline methods

| Architecture   | Parameters settings          |                             |
|----------------|------------------------------|-----------------------------|
| 4DHemoFormer   | Layers                       | 4                           |
|                | Hidden size                  | 1024                        |
|                | Optimizer                    | Adam                        |
|                | Scheduler                    | ReduceLRonPlateau           |
|                | Number of heads              | 8                           |
|                | Dropout rate                 | 0.1                         |
|                | Learning rate                | 0.0001                      |
|                | Physical loss weight (Alpha) | 0.5                         |
|                | Training points              | 2500 /frames (FPS sampling) |
| Testing points | Overall grid (patch based)   |                             |
| PINN           | FNN width                    | 128                         |
|                | FNN depth                    | 4                           |
|                | Optimizer                    | Adam                        |
|                | Learning rate                | 0.0001                      |
|                | scheduler                    | StepLR                      |
|                | Scheduler step               | 1000                        |
|                | Scheduler gamma              | 0.99                        |
|                | Physical loss weight (Alpha) | 0.5                         |
|                | Training points              | 2500 /frames (FPS sampling) |
|                | Testing points               | Overall grid                |
| FNO            | Layers                       | 4                           |
|                | Hidden dim                   | 32                          |
|                | Modes                        | 12,12,12                    |
|                | Optimizer                    | Adam                        |
|                | Learning rate                | 1e-3                        |
|                | Scheduler                    | StepLR                      |
|                | Scheduler step               | 20                          |
|                | Scheduler gamma              | 0.9                         |
| DeepONet       | Width                        | 100                         |
|                | Branch depth                 | 8                           |
|                | Trunk depth                  | 8                           |
|                | Optimizer                    | Adam                        |
|                | Learning rate                | 1e-3                        |
|                | Scheduler                    | StepLR                      |
|                | Scheduler step               | 20                          |
|                | Scheduler gamma              | 0.9                         |

398

399 **References:**

- 400 [s1]Mons, V., Chassaing, J.-C., Gomez, T. & Sagaut, P. Reconstruction of unsteady viscous flows  
401 using data assimilation schemes. *J. Comput. Phys.* 316, 255–280 (2016).
- 402 [s2]Asch, M., Bocquet, M. & Nodet, M. *Data Assimilation: Methods, Algorithms, and Applications*  
403 (Society for Industrial and Applied Mathematics, 2016).
-
